# Supplementary material for: Isolation and Characterization of a Novel Vibrio natriegens—Infecting Phage and Its Potential Therapeutic Application in Abalone Aquaculture
Source: MDPI journal article supplement (doi:10.3390/biology11111670), 2022-11-17
Supplement: s1 [file s1]

**Table S1.** Host range of phage vB\_VnaS-L3.

| Strains       | Best matched species<br>(% Identity of 16S rDNA) | GenBank ID | Source and location                               | Susceptibility to phage vB_VnaS-L3 1 |
|---------------|--------------------------------------------------|------------|---------------------------------------------------|--------------------------------------|
| AbY-1805      | <i>Vibrio natriegens</i><br>(100)                | OP247638   | Cells of <i>Haliotis discus hannai</i> Ino, China | +                                    |
| AbY-1806      | <i>Vibrio natriegens</i><br>(99.93)              | OP268245   | Cells of <i>Haliotis discus hannai</i> Ino, China | +                                    |
| AbY-1807      | <i>Vibrio natriegens</i><br>(99.86)              | OP268246   | Larval rearing water,<br>China                    | +                                    |
| MCCC 1A14388  | <i>Vibrio natriegens</i><br>(99.93)              |            | Shrimp farm water,<br>China                       | -                                    |
| MCCC 1K03861  | <i>Vibrio natriegens</i><br>(99.93)              |            | Sediment of oyster<br>farming area, China         | -                                    |
| MCCC 1H000251 | <i>Vibrio natriegens</i><br>(100)                |            | Type strain                                       | -                                    |
| ScY-2105      | <i>Vibrio alginolyticus</i><br>(99.72)           | OP268247   | Cells of <i>Mizuhopecten yessoensis</i> , China   | -                                    |
| ScY-2106      | <i>Vibrio alginolyticus</i><br>(99.93)           | OP268248   | Cells of <i>Azumapecten farreri</i> , China       | -                                    |
| ScY-2108      | <i>Vibrio alginolyticus</i><br>(99.93)           | OP268249   | Cells of <i>Azumapecten farreri</i> , China       | -                                    |
| WaY-2220      | <i>Vibrio alginolyticus</i><br>(99.72)           | OP268250   | Larval rearing water,<br>China                    | -                                    |
| ScY-2203      | <i>Vibrio splendidus</i><br>(99.93)              | OP268251   | Cells of <i>Azumapecten farreri</i> , China       | -                                    |
| ScY-2204      | <i>Vibrio splendidus</i><br>(99.93)              | OP268252   | Cells of <i>Azumapecten farreri</i> , China       | -                                    |
| ScG-2206      | <i>Vibrio splendidus</i><br>(100.00)             | OP268253   | Cells of <i>Azumapecten farreri</i> , China       | -                                    |
| WaY-2207      | <i>Vibrio splendidus</i><br>(100.00)             | OP268254   | Coastal seawater,<br>China                        | -                                    |

|          |                                           |          |                                                   |   |
|----------|-------------------------------------------|----------|---------------------------------------------------|---|
| ScY-2109 | <i>Vibrio atlanticus</i><br>(99.93)       | OP268255 | Cells of <i>Azumapecten farreri</i> , China       | - |
| ScG-2110 | <i>Vibrio atlanticus</i><br>(99.92)       | OP268256 | Cells of <i>Azumapecten farreri</i> , China       | - |
| AbG-1906 | <i>Vibrio chagasii</i><br>(100.00)        | OP268257 | Cells of <i>Haliotis discus hannai</i> Ino, China | - |
| AbG-1907 | <i>Vibrio chagasii</i><br>(100.00)        | OP268258 | Cells of <i>Haliotis discus hannai</i> Ino, China | - |
| WaY-2101 | <i>Vibrio chagasii</i><br>(99.51)         | OP268259 | Larval rearing water, China                       | - |
| AbY-1902 | <i>Vibrio mediterranei</i><br>(99.86)     | OP268260 | Cells of <i>Haliotis discus hannai</i> Ino, China | - |
| AbY-1905 | <i>Vibrio mediterranei</i><br>(100.00)    | OP268261 | Cells of <i>Haliotis discus hannai</i> Ino, China | - |
| AbY-2104 | <i>Vibrio mediterranei</i><br>(100.00)    | OP268262 | Cells of <i>Haliotis discus hannai</i> Ino, China | - |
| ScG-2205 | <i>Vibrio crassostreae</i><br>(99.78)     | OP268263 | Cells of <i>Azumapecten farreri</i> , China       | - |
| AbY-2219 | <i>Vibrio crassostreae</i><br>(99.79)     | OP268264 | Cells of <i>Haliotis discus hannai</i> Ino, China | - |
| AbY-1901 | <i>Vibrio owensii</i><br>(100.00)         | OP268265 | Cells of <i>Haliotis discus hannai</i> Ino, China | - |
| WaY-2217 | <i>Vibrio parahaemolyticus</i><br>(99.79) | OP268266 | Coastal seawater, China                           | - |
| AbY-1904 | <i>Vibrio neocaledonicus</i><br>(100.00)  | OP268267 | Cells of <i>Haliotis discus hannai</i> Ino, China | - |
| ScG-2111 | <i>Vibrio celticus</i><br>(100.00)        | OP268268 | Cells of <i>Azumapecten farreri</i> , China       | - |
| WaG-2102 | <i>Shewanella japonica</i><br>(99.93)     | OP268269 | Larval rearing water, China                       | - |
| AbG-2103 | <i>Shewanella japonica</i><br>(100.00)    | OP268270 | Cells of <i>Haliotis discus hannai</i> Ino, China | - |
| ScG-2112 | <i>Shewanella japonica</i><br>(99.93)     | OP268271 | Cells of <i>Azumapecten farreri</i> , China       | - |

|          |                                              |          |                                                   |   |
|----------|----------------------------------------------|----------|---------------------------------------------------|---|
| AbG-1908 | <i>Shewanella waksmanii</i><br>(99.93)       | OP268272 | Cells of <i>Haliotis discus hannai</i> Ino, China | - |
| ScG-2113 | <i>Shewanella colwelliana</i><br>(100.00)    | OP268273 | Cells of <i>Azumapecten farreri</i> , China       | - |
| AbY-1903 | <i>Photobacterium jeanii</i><br>(99.78)      | OP268274 | Cells of <i>Haliotis discus hannai</i> Ino, China | - |
| ScY-2107 | <i>Photobacterium rosenbergii</i><br>(99.84) | OP268275 | Cells of <i>Azumapecten farreri</i> , China       | - |
| Wa-1801  | <i>Idiomarina</i> sp.<br>(99.93)             | OP268276 | Surface seawater, Yellow sea, China               | - |
| Wa-1802  | <i>Pseudoalteromonas</i> sp.<br>(100.00)     | OP268277 | Surface seawater, Yellow sea, China               | - |
| Wa-1803  | <i>Pseudoalteromonas marina</i><br>(99.93)   | OP268278 | Surface seawater, Yellow sea, China               | - |
| Wa-1804  | <i>Sulfitobacter</i> sp.<br>(99.97)          | OP268279 | Larval rearing water, China                       | - |

1. +, susceptible; -, resistant.

**Table S2.** Antimicrobial resistance and susceptibility of *V. natriegens* AbY-1805

| Antibiotic class/group         | Antibiotic name | Concentration (µg disc <sup>-1</sup> ) | Standard of inhibition zone (mm) |              |           | Diameter of inhibition zone | Interpretive category result |
|--------------------------------|-----------------|----------------------------------------|----------------------------------|--------------|-----------|-----------------------------|------------------------------|
|                                |                 |                                        | Resistant                        | Intermediate | Sensitive |                             |                              |
| β-Lactam/β-Lactamase Inhibitor | Penicillin G    | 10 U                                   | ≤ 11                             | 12~15        | ≥ 16      | 15                          | I                            |
|                                | Oxacillin       | 1                                      | ≤ 10                             | 11~12        | ≥ 13      | No zone                     | R                            |
|                                | Ampicillin      | 10                                     | ≤ 13                             | 14~16        | ≥ 17      | 17                          | S                            |
|                                | Carbenicillin   | 100                                    | ≤ 19                             | 20~22        | ≥ 23      | 14                          | R                            |
|                                | Piperacillin    | 100                                    | ≤ 17                             | 18~20        | ≥ 21      | 21                          | S                            |
| Cephalosporin/Cephem           | Cefalexin       | 30                                     | ≤ 14                             | 15~17        | ≥ 18      | 13                          | R                            |
|                                | Cefazolin       | 30                                     | ≤ 14                             | 15~17        | ≥ 18      | 12                          | R                            |
|                                | Cefradine       | 30                                     | ≤ 14                             | 15~17        | ≥ 18      | 12                          | R                            |

|                          |                               |            |           |       |           |         |   |
|--------------------------|-------------------------------|------------|-----------|-------|-----------|---------|---|
|                          | Cefuroxime                    | 30         | $\leq 14$ | 15~22 | $\geq 23$ | 14      | R |
|                          | Ceftazidime                   | 30         | $\leq 14$ | 15~17 | $\geq 18$ | 17      | I |
|                          | Ceftriaxone                   | 30         | $\leq 13$ | 14~20 | $\geq 21$ | 20      | I |
|                          | Cefoperazone                  | 75         | $\leq 15$ | 16~20 | $\geq 21$ | 19      | I |
| Aminoglycosides          | Amikacin                      | 30         | $\leq 14$ | 15~16 | $\geq 17$ | 9       | R |
|                          | Gentamicin                    | 10         | $\leq 12$ | 13~14 | $\geq 15$ | 10      | R |
|                          | Kanamycin                     | 30         | $\leq 13$ | 14~17 | $\geq 18$ | 9       | R |
|                          | Neomycin                      | 30         | $\leq 12$ | 13~16 | $\geq 17$ | 10      | R |
| Tetracycline             | Tetracycline                  | 30         | $\leq 14$ | 15~18 | $\geq 19$ | No zone | R |
|                          | Oxytetracycline               | 30         | $\leq 14$ | 12~18 | $\geq 19$ | 21      | S |
|                          | Minocycline                   | 30         | $\leq 14$ | 15~18 | $\geq 19$ | No zone | R |
|                          | Doxycycline                   | 30         | $\leq 12$ | 13~15 | $\geq 16$ | No zone | R |
| Macrolides               | Erythrocine                   | 15         | $\leq 13$ | 14~22 | $\geq 23$ | 10      | R |
|                          | Medemycin                     | 30         | $\leq 13$ | 14~17 | $\geq 18$ | 11      | R |
| Fluoroquinolones         | Norfloxacin                   | 10         | $\leq 12$ | 13~16 | $\geq 17$ | 19      | S |
|                          | Ofloxacin                     | 5          | $\leq 12$ | 13~15 | $\geq 16$ | 19      | S |
|                          | Ciprofloxacin                 | 5          | $\leq 15$ | 16~20 | $\geq 21$ | 22      | S |
| Glycopeptides            | Vancomycin                    | 30         | $\leq 14$ | 15~16 | $\geq 17$ | No zone | R |
| polymyxins               | Polymyxin B                   | 300 IU     | $\leq 8$  | 9~11  | $\geq 12$ | 13      | S |
| Folate Pathway Inhibitor | Sulfamethoxazole-trimethoprim | 23.75/1.25 | $\leq 12$ | 13~15 | $\geq 16$ | 22      | S |
| Nitrofurans              | Furazolidone                  | 300        | $\leq 14$ | 15~16 | $\geq 17$ | 12      | S |
| Phenicol                 | Chloramphenicol               | 30         | $\leq 12$ | 13~17 | $\geq 18$ | 24      | S |
| Lincosamide              | Clindamycin                   | 2          | $\leq 14$ | 15~20 | $\geq 21$ | No zone | R |
| Fluorfenicol             | Florfenicol                   | 30         | $\leq 12$ | 13~17 | $\geq 18$ | 17      | I |

Note: S = susceptible; I = intermediate; R = resistant. The susceptibility of the strain AbY-1805 to antibiotics (Hangwei, Hangzhou, China, except for oxytetracycline and florfenicol)

was tested by using disk-diffusion method followed Kirby-Bauer disk diffusion method and the standard techniques of the Clinical and Laboratory Standard Institute (CLSI) [102,103]. Briefly, the disks were dispensed on the surface of the RO agar medium that was mixed with the strain AbY-1805, and incubated at 28 °C for 24 h. Diameters of the inhibition zone were interpreted according to the Hangwei antibiotic susceptible zone interpretation chart and the M45 guideline for *Vibrio* spp. (not *V. cholerae*) of CLSI [103], except for oxytetracycline that was interpreted according to the M2-A8 guideline of CLSI [104].

**Table S3.** Genome annotation of *V. natriegens* AbY-1805-infecting phage vB\_VnaS-L3

| ORF | Start | Stop  | Strand | Putative function          | CD accession no. | Best matched species                 | Identity (%) |
|-----|-------|-------|--------|----------------------------|------------------|--------------------------------------|--------------|
| 1   | 46    | 528   | +      | Hypothetical protein       | AAW67525.1       | Listonella phage $\phi$ HSIC         | 96.9         |
| 2   | 540   | 944   | +      | Hypothetical protein       | AAW67526.1       | Listonella phage $\phi$ HSIC         | 92.5         |
| 3   | 1034  | 4273  |        | Putative tail tape measure |                  |                                      |              |
|     |       |       | +      | protein                    | AAW67528.1       | Listonella phage $\phi$ HSIC         | 77.9         |
| 4   | 4273  | 5859  | +      | Hypothetical protein       | AAW67529.1       | Listonella phage $\phi$ HSIC         | 83.9         |
| 5   | 5913  | 8096  | +      | Hypothetical protein       | AUG88486.1       | Vibrio phage Vp-R1                   | 47.7         |
| 7   | 8313  | 8627  | +      | Hypothetical protein       | AGN34328.1       | Vibrio phage pYD38-B                 | 96.8         |
| 8   | 8727  | 9059  | -      | Hypothetical protein       | AUR86940.1       | Vibrio phage 1.091.O.-10N.286.52.B12 | 81.5         |
| 9   | 9196  | 9402  | -      | Hypothetical protein       | AGN34330.1       | Vibrio phage pYD38-B                 | 91.2         |
| 11  | 9610  | 9816  | -      | Hypothetical protein       | AUR92455.1       | Vibrio phage 1.172.O.-10N.261.52.F5  | 69.1         |
| 12  | 10180 | 10389 | -      | Hypothetical protein       | AGN34331.1       | Vibrio phage pYD38-B                 | 73.9         |
| 13  | 10386 | 10538 | -      | Hypothetical protein       | AGN34332.1       | Vibrio phage pYD38-B                 | 86           |
| 14  | 10602 | 11060 | -      | Putative phage lysozyme    | AAW67534.1       | Listonella phage $\phi$ HSIC         | 90.1         |
| 15  | 11057 | 11236 | -      | Hypothetical protein       | AVR75884.1       | Vibrio phage ValSw3-3                | 97           |
| 17  | 11328 | 11876 | -      | hypothetical protein       | AGN34334.1       | Vibrio phage pYD38-B                 | 77.5         |
| 18  | 11873 | 12052 | -      | hypothetical protein       | AGN34335.1       | Vibrio phage pYD38-B                 | 94.9         |
| 19  | 12049 | 12255 | -      | Hypothetical protein       | AGN34336.1       | Vibrio phage pYD38-B                 | 89.7         |
| 20  | 12248 | 12547 | -      | Hypothetical protein       | ADM26694.1       | Pseudoalteromonas phage H105/1       | 53.5         |
| 21  | 12540 | 12725 | -      | Hypothetical protein       | AZF88631.1       | Vibrio phage P23                     | 95.1         |

|    |       |       |   |                                             |            |                                     |      |
|----|-------|-------|---|---------------------------------------------|------------|-------------------------------------|------|
| 22 | 12750 | 12965 | + | Hypothetical protein                        | AAW67537.1 | Listonella phage $\phi$ HSIC        | 69   |
| 23 | 12991 | 13374 | - | hypothetical protein                        | AAW67538.1 | Listonella phage $\phi$ HSIC        | 96.8 |
| 24 | 13371 | 15230 | - | Putative helicase                           | AAW67539.1 | Listonella phage $\phi$ HSIC        | 83.4 |
| 25 | 15199 | 15849 | - | Hypothetical protein                        | AIM40751.1 | Idiomarinaceae phage 1N2-2          | 34.9 |
| 26 | 15849 | 16403 | - | Hypothetical protein                        | AAW67540.1 | Listonella phage $\phi$ HSIC        | 95.6 |
| 27 | 16388 | 17242 | - | Hypothetical protein                        | AGH16091.1 | Vibrio phage pYD21-A                | 62.3 |
| 28 | 17280 | 17813 | - | Hypothetical protein                        | AAW67542.1 | Listonella phage $\phi$ HSIC        | 93.8 |
| 29 | 17820 | 18530 | - | Putative helicase subunit                   | AAW67543.1 | Listonella phage $\phi$ HSIC        | 96.2 |
| 31 | 18922 | 21234 | - | Putative DNA<br>primase/polymerase          | QXO10371.1 | Proteus phage vB_PmiM_ZX7           | 41.4 |
| 32 | 21711 | 22262 | + | Putative DNA polymerase III<br>beta subunit | AAW67499.1 | Listonella phage $\phi$ HSIC        | 92.9 |
| 33 | 22265 | 22405 | + | Hypothetical protein                        | AVR75863.1 | Vibrio phage ValSw3-3               | 80.4 |
| 34 | 22544 | 23059 | + | Coil containing protein                     | QGZ13264.1 | Vibrio phage NF                     | 64.6 |
| 35 | 23139 | 23312 | + | Protein of unknown function<br>DUF551       | AUR89397.1 | Vibrio phage 1.122.B.-10N.286.46.F8 | 83.6 |
| 36 | 23309 | 23461 | + | Hypothetical protein                        | AZF88614.1 | Vibrio phage P23                    | 67.4 |
| 37 | 23458 | 23760 | + | Hypothetical protein                        | AVR75857.1 | Vibrio phage ValSw3-3               | 81.8 |
| 38 | 23790 | 24635 | + | DNA-binding domain protein                  | AUR99418.1 | Vibrio phage 1.265.O.-10N.286.52.F6 | 52.9 |
| 39 | 24632 | 24844 | + | Hypothetical protein                        | AGN34354.1 | Vibrio phage pYD38-B                | 87.1 |
| 40 | 24841 | 25125 | + | Hypothetical protein                        | AZF88608.1 | Vibrio phage P23                    | 93.6 |
| 41 | 25184 | 25648 | + | DNA-packaging protein                       | AZF88606.1 | Vibrio phage P23                    | 98.7 |
| 42 | 25635 | 27233 | + | Terminase large subunit                     | AZF88605.1 | Vibrio phage P23                    | 97.6 |
| 43 | 27353 | 27805 | + | Hypothetical protein                        | AGH16106.1 | Vibrio phage pYD21-A                | 83.3 |
| 44 | 28012 | 28464 | + | Hypothetical protein                        | AAW67508.1 | Listonella phage $\phi$ HSIC        | 88.9 |
| 45 | 28529 | 29023 | + | Hypothetical protein                        | AVR75852.1 | Vibrio phage ValSw3-3               | 45.6 |

|    |       |       |   |                         |            |                                     |      |
|----|-------|-------|---|-------------------------|------------|-------------------------------------|------|
| 46 | 29079 | 30509 | + | Hypothetical protein    | AGN34361.1 | Vibrio phage pYD38-B                | 95   |
| 48 | 31096 | 32166 |   | Putative NAD-asparagine | AAW67511.1 |                                     | 94.5 |
|    |       |       | + | ribosyltransferase      |            | Listonella phage $\phi$ HSIC        |      |
| 49 | 32264 | 32578 | + | Hypothetical protein    | AGN34363.1 | Vibrio phage pYD38-B                | 84   |
| 50 | 32575 | 32763 | + | Hypothetical protein    | AGN34365.1 | Vibrio phage pYD38-B                | 82.3 |
| 52 | 33459 | 34208 | + | DNA methylase, partial  | AUR81467.1 | Vibrio phage 1.007.O.-10N.261.55.F9 | 68.5 |
| 53 | 34302 | 34976 | + | Hypothetical protein    | AGN34367.1 | Vibrio phage pYD38-B                | 95.5 |
| 54 | 34987 | 35934 | + | Major capsid protein    | AVR75838.1 | Vibrio phage ValSw3-3               | 97.4 |
| 55 | 35965 | 36555 | + | Hypothetical protein    | AAW67516.1 | Listonella phage $\phi$ HSIC        | 83.8 |
| 56 | 36861 | 37358 | + | Hypothetical protein    | AGN34370.1 | Vibrio phage pYD38-B                | 92.1 |
| 57 | 37362 | 38159 | + | Putative DNA methylase  | AIM40744.1 | Idiomarinaceae phage 1N2-2          | 67.2 |
| 58 | 38159 | 38560 | + | Head-closure protein    | AZF88585.1 | Vibrio phage P23                    | 92.4 |
| 59 | 38565 | 39035 | + | Hypothetical protein    | AVR75833.1 | Vibrio phage ValSw3-3               | 95.5 |
| 60 | 39035 | 39418 | + | Hypothetical protein    | AAW67523.1 | Listonella phage $\phi$ HSIC        | 91.3 |
| 61 | 39489 | 39965 | + | Hypothetical protein    | AAW67524.1 | Listonella phage $\phi$ HSIC        | 98.7 |

---
